# Supplementary material for: LuVO4:Ln3+ (Ln = Sm, Eu, Dy, Er and Tm) with high uniform size and morphology: Controlled synthesis, growth mechanism and optical properties
Source: Royal Society of Chemistry journal article supplement (doi:10.1039/c1ce05518f), 2011-01-01
Supplement: c1ce05518f.pdf [file c1ce05518f.pdf]

**LuVO<sub>4</sub> : Ln<sup>3+</sup> (Ln = Sm, Eu, Dy, Er and Tm) with  
High Uniform Size and Morphology: Controlled  
Synthesis, Characterization, Growth Mechanism  
and Optical Property**

(ID: CrystEngComm C1CE05518F)

**Youjin Zhang \*, Hongmei He, Wei Zhu and Ao Zheng**

Department of Chemistry, University of Science and Technology of China, 96 Jinzhai

Road, Hefei, 230026, P. R. China

\*Corresponding author:

Youjin Zhang, [zyj@ustc.edu.cn](mailto:zyj@ustc.edu.cn)

Tel: +86-551-3492145;

Fax: +86-551-3492083

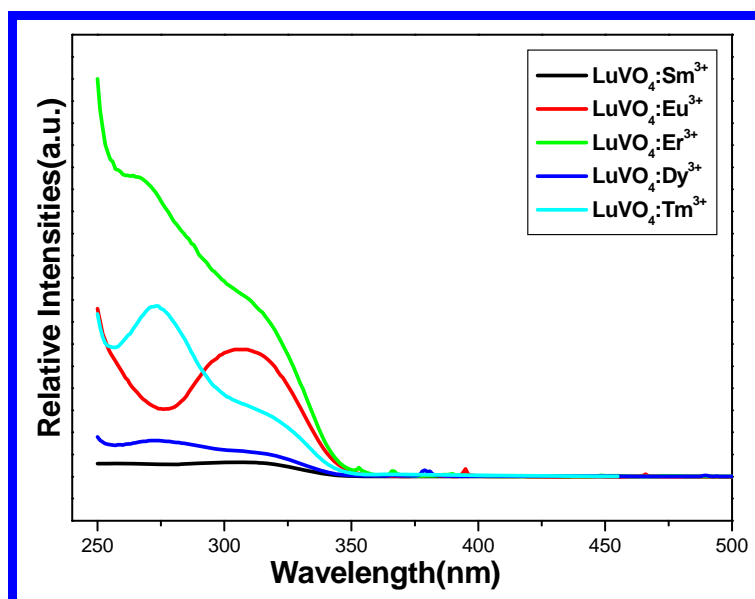

**Figure S1.** The excitation spectra of the LuVO<sub>4</sub>:Sm<sup>3+</sup>, LuVO<sub>4</sub>:Eu<sup>3+</sup>, LuVO<sub>4</sub>:Dy<sup>3+</sup>, LuVO<sub>4</sub>:Er<sup>3+</sup> and LuVO<sub>4</sub>:Tm<sup>3+</sup> samples monitored with 645 nm emission of Sm<sup>3+</sup>, 618 nm emission of Eu<sup>3+</sup>, 574 nm emission of Dy<sup>3+</sup>, 553 nm emission of Er<sup>3+</sup> and 474 nm emission of Tm<sup>3+</sup>, respectively
